# Supplementary material
Source: Springer Nature journal article supplement (https://www.springermedizin.de/resource/supplementary/12913_2008_887_MOESM8_ESM.pdf/9536174)

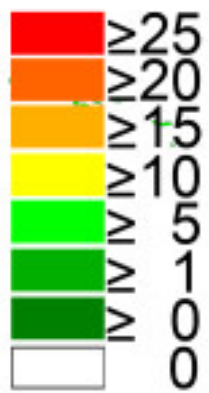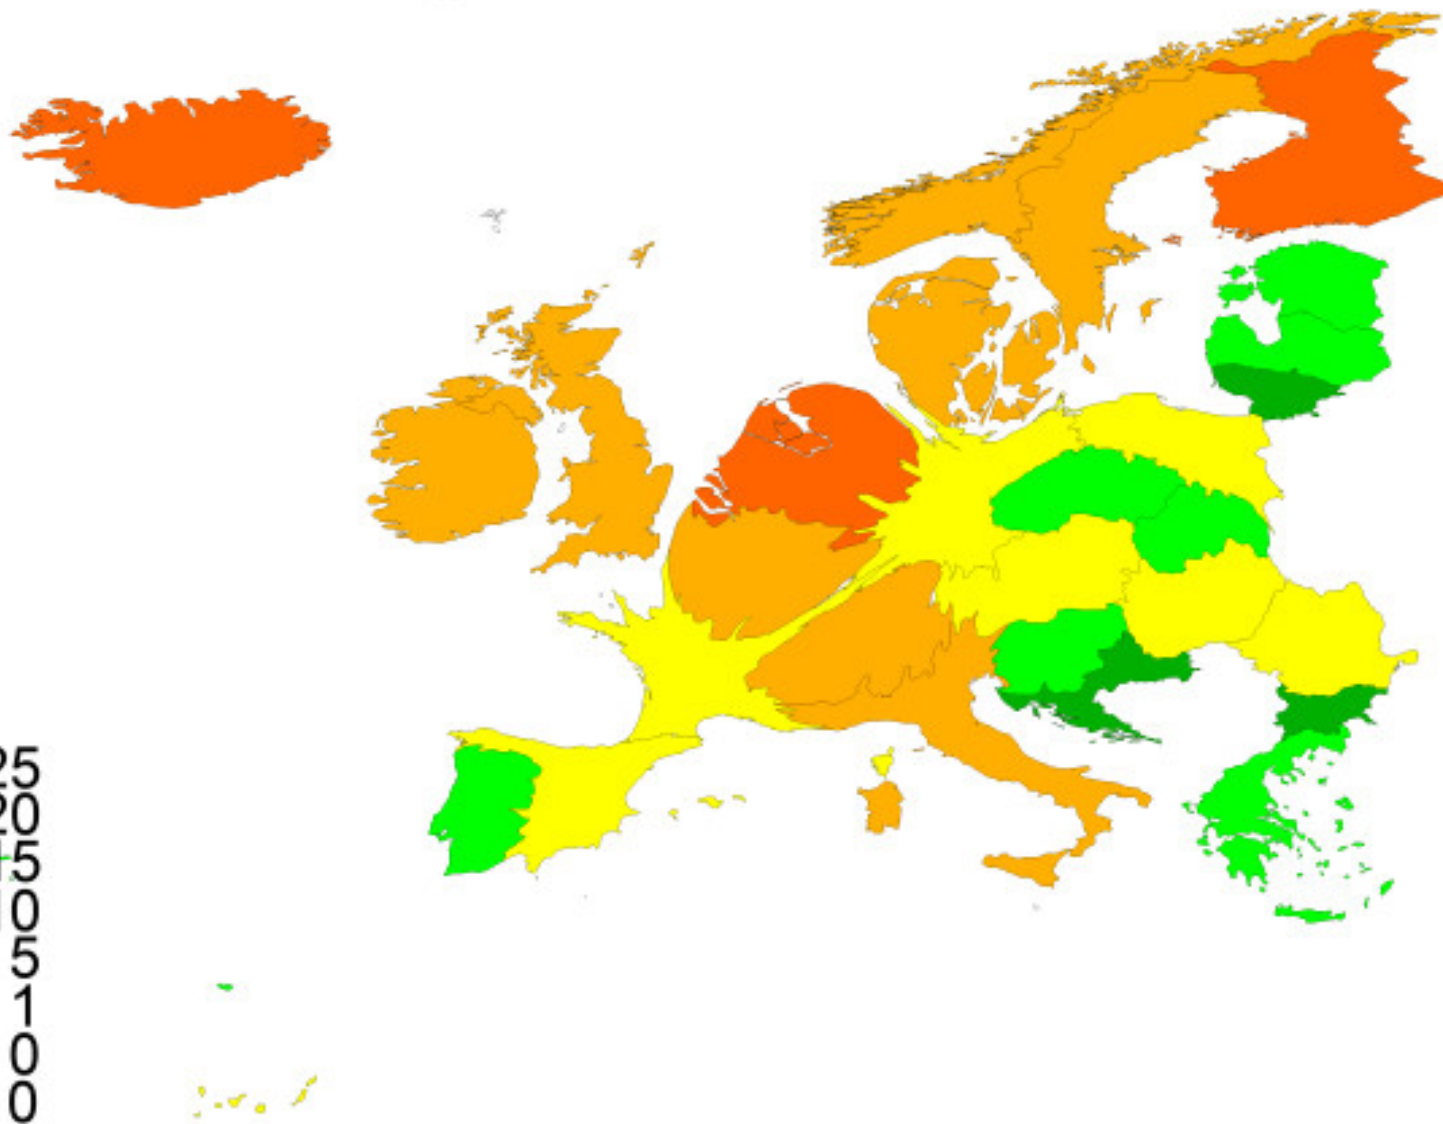

Supplement: MOESM8 [file 9536174]
